# Supplementary material for: How Fast Can a Human Run? − Bipedal vs. Quadrupedal Running
Source: PubMed Central journal article supplement (PMC4928019; doi:10.3389/fbioe.2016.00056), 2016-06-30
Supplement: table_1.pdf [file table_1.pdf]

Table S1. Bipedal and quadrupedal world record 100-m sprint times from 1912.

| Year | 100-m world records (s) |                     |
|------|-------------------------|---------------------|
|      | Bipedal <sup>1)</sup>   | Quadrupedal         |
| 1912 | 10.6                    |                     |
| 1921 | 10.4                    |                     |
| 1930 | 10.3                    |                     |
| 1956 | 10.1                    |                     |
| 1960 | 10.0                    |                     |
| 1968 | 9.95                    |                     |
| 1983 | 9.93                    |                     |
| 1988 | 9.92                    |                     |
| 1991 | 9.90                    |                     |
| 1991 | 9.86                    |                     |
| 1994 | 9.85                    |                     |
| 1996 | 9.84                    |                     |
| 1999 | 9.79                    |                     |
| 2002 | 9.78                    |                     |
| 2005 | 9.77                    |                     |
| 2007 | 9.74                    |                     |
| 2008 | 9.72                    | 18.58               |
| 2008 | 9.69                    |                     |
| 2009 | 9.58                    |                     |
| 2011 |                         | 18.25               |
| 2012 |                         | 17.47               |
| 2013 |                         | 17.23               |
| 2013 |                         | 16.87               |
| 2014 |                         | 15.86               |
| 2015 |                         | 15.71 <sup>2)</sup> |

Source: <sup>1)</sup> International Association of Athletics Federations (Hymans and Matrahazi 2015).

<sup>2)</sup> Guinness World Records. Watch Japan's Kenichi Ito scamper to GWR Day success with fastest 100 m running on all fours (Swatman, 2015).
